# Supplementary material
Source: publisher figshare collection journal article supplement (https://future-science-group.figshare.com/ndownloader/files/31547507)
Supplement: Supplementary file 1 [file 31547507]

Supplementary Table 1. Patient Demographics

| Demographics (N=20) | % or mean (SD) |
| --- | --- |
| Gender (Male) | 70% |
| Race |  |
| White | 95% |
| African American | 5% |
| Age (years) | 66.2 (10.59) |
| Ethnicity (Hispanic) | 5% |
